# Supplementary material for: The complete chloroplast genome of Hibiscus syriacus using long-read sequencing: Comparative analysis to examine the evolution of the tribe Hibisceae
Source: Front Plant Sci. 2023 Feb 2;14:1111968. doi: 10.3389/fpls.2023.1111968 (PMC9931742; doi:10.3389/fpls.2023.1111968)
Supplement: Supplementary file 2 [file Table_1.xlsx]

## Sheet: Supple Table 1
Supplementary Table 1. List of the chloroplast genomes used in comparative analysis
Species	Accession Number
Hibiscus syriacus var. micranthus	NC_062601.1
Hibiscus cannabinus	NC_045873.1
Hibiscus taiwanensis	NC_054167.1
Hibiscus rosa-sinensis	NC_042239.1
Hibiscus tiliaceum	NC_053627.1
Hibiscus hamabo	NC_030195.1
Urena procumbens	NC_054171.1
Hibiscus trionum	NC_060636.1
Abelmoschus esculentus	NC_035234.1
Abelmoschus manihot	NC_053353.1
Abelmoschus moschatus	NC_053355.1
Abelmoschus sagittifolius	NC_053354.1
Gossypium hirsutum	NC_007944.1

## Sheet: Supple Table 2
Supplementary Table 2. Genes present in the chloroplast genome of H. syriacus var. Baekdansim
Gene category	Gene function	Gene name
Photosynthesis	Subunits of phtosystem I	psaA; psaB; psaC; psaI; psaJ
	Subunits of phtosystem II	psbA; psbB; psbC; psbD; psbE; psbF; psbH; psbI; psbJ; psbK; psbL; psbM; psbT; psbZ
	Subunits of ATP synthase	atpA; atpB; atpE; atpF; atpH; atpI
	Subunits of cytochrome	petA; petB; petD; petG; petL; petN
	Large subunit of Rubisco	rbcL
	Subunits of NADH dehydrogenase	ndhA; ndhB*; ndhC; ndhD; ndhE; ndhF; ndhG; ndhH; ndhI; ndhJ; ndhK
	Photosystem assembly/ stability factors	pafI; pafII; pbf1
Self-replication	Small subunit of ribosome	rps2; rps3; rps4; rps7*; rps8; rps11; rps12*; rps14; rps15; rps16; rps18; rps19
	Large subunit of ribosome	rpl2*; rpl14; rpl16; rpl20; rpl22; rpl23*; rpl32; rpl33; rpl36
	DNA-dependent RNA polymerase	rpoA; rpoB; rpoC1; rpoC2
	transfer RNAs (tRNA)	trnA-UGC*; trnC-GCA; trnD-GUC; trnE-UUC; trnF-GAA; trnfM-CAU; trnG-GCC; trnG-UCC; trnH-GUG; trnI-CAU*; trnI-GAU*; trnK-UUU; trnL-CAA*; trnL-UAA; trnL-UAG; trnM-CAU; trnN-GUU*; trnP-UGG; trnQ-UUG; trnR-ACG*; trnR-UCU; trnS-GCU; trnS-GGA; trnS-UGA; trnT-GGU; trnT-UGU; trnV-GAC*; trnV-UAC; trnW-CCA; trnY-GUA
	ribosomal RNAs (rRNA)	rrn5*; rrn4.5*; rrn16*; rrn23*
Other genes	Maturase	matK
	Envelope membrane protein	cemA
	Subunit of acetyl-CoA	accD
	C-type cytochrome synthesis gene	ccsA
	Protease	clpP1
	Translational initiation factor	infA
Unknown	Conserved hypothetical chloroplast reading frames	ycf1; ycf2*
* Gene with copies

## Sheet: Supple Table 3
Supplementary Table 3. The distribution of simple sequence repeats (SSRs) in the chloroplast genome of H. syriacus var. Baekdansim
Type	Repeats	Count
Mono	A/T	81
	C/G	1
Di	AG/CT	1
	AT/AT	9
Tri	AAT/ATT	7
Tetra	AAAT/ATTT	3
	AACT/AGTT	1
	AATC/ATTG	1
	AATG/ATTC	1
Penta	AAAGT/ACTTT	2
	AATAT/ATATT	2
Total		109

## Sheet: Supple Table 4
Supplementary Table 4. Length of chloroplast genome and quadripartite section of 13 Hibisceae species
	Total Length (bp)	LSC length (bp)	IRB length (bp)	SSC length (bp)	IRA length (bp)
Hibiscus syriacus var. Baekdansim	161026	89705	25745	19831	25745
Hibiscus syriacus var. Micranthus	161022	89701	25745	19831	25745
Hibiscus rosa-sinensis	160951	89509	25598	20246	25598
Hibiscus tiliaceum	161748	89190	26471	19616	26471
Hibiscus hamabo	161729	89217	26471	19570	26471
Hibiscus taiwanensis	162800	90175	26617	19391	26617
Hibiscus cannabinus	162903	90351	26533	19486	26533
Urena procumbens	163336	90475	26635	19591	26635
Hibiscus trionum	160530	89272	26152	18954	26152
Abelmoschus esculentus	163121	88071	28009	19032	28009
Abelmoschus manihot	163428	88194	28150	18934	28150
Abelmoschus moschatus	163430	88243	28128	18931	28128
Abelmoschus sagittifolius	163453	88314	28162	18815	28162
